# Supplementary material
Source: HighWire-hosted journal article supplement (https://bjgpopen.org/highwire/filestream/5720/field_highwire_adjunct_files/0/PH_BJGPO.2022.0061_Supp.pdf)
Supplement: PH_BJGPO.2022.0061_Supp.pdf [file PH_BJGPO.2022.0061_Supp.pdf]

## Supplementary Material

**Table S1- Included Articles**

| Title                                                                                                          | Authors                                                                                                                                   | Year | Journal                                     | Volume | Issue | Pages     |
|----------------------------------------------------------------------------------------------------------------|-------------------------------------------------------------------------------------------------------------------------------------------|------|---------------------------------------------|--------|-------|-----------|
| Implementing the Mental Health Act 2007 in British general practice: Lessons from Ireland                      | Jabbar F.; Doherty A.M.; Aziz M.; Kelly B.D.                                                                                              | 2011 | International Journal of Law and Psychiatry | 34     | 6     | 414-418   |
| Difficulties with use of the Mental Health (Scotland) Act 1984 by general practitioners in rural Scotland      | Begum M.; Helliwell R.; Mackay A.                                                                                                         | 2004 | Psychiatric Bulletin                        | 28     | 7     | 248-250   |
| Training for approval under Section 12(2) of the Mental Health Act 1983                                        | Brown N.; Humphreys M.                                                                                                                    | 2003 | Advances in Psychiatric Treatment           | 9      | 1     | 38-42     |
| Competency and use of the Mental Health Act - A matrix to aid decision-making                                  | Tan J.; Elphick M.                                                                                                                        | 2002 | Psychiatric Bulletin                        | 26     | 3     | 104-106   |
| Research into the Mental Health Act: A qualitative study of the views of those using or affected by it         | Marriott S.; Audini B.; Lelliott P.; Webb Y.; Duffett R.                                                                                  | 2001 | Journal of Mental Health                    | 10     | 1     | 33-39     |
| Knowledge of emergency compulsory detention procedures among general practitioners in Edinburgh: Sample survey | Humphreys M.; Ryman A.                                                                                                                    | 1996 | British Medical Journal                     | 312    | 7044  | 1462-1463 |
| Opinions of key stakeholders concerning involuntary admission of patients under the Mental Health Act 2001     | Georgieva I.; Bainbridge E.; McGuinness D.; Keys M.; Brosnan L.; Felzmann H.; Maguire J.; Murphy K.; Higgins A.; McDonald C.; Hallahan B. | 2017 | Irish Journal of Psychological Medicine     | 34     | 4     | 223-232   |
| Inter-disciplinary teaching strategies for mental health law                                                   | Hanson L.; Fitzpatrick R.; Ella S.A.-E.                                                                                                   | 2015 | International Journal of Law and Psychiatry | 39     |       | 1-5       |

|                                                                                                                                |                                                                                  |      |                                                                                                                                                          |     |    |         |
|--------------------------------------------------------------------------------------------------------------------------------|----------------------------------------------------------------------------------|------|----------------------------------------------------------------------------------------------------------------------------------------------------------|-----|----|---------|
| Knowledge and confidence of the Mental Health Act in Scotland: a survey of general practitioners                               | Conway L.;<br>Mohammed N.; Jardine C.; Crabb J.                                  | 2015 | Medicine, science, and the law                                                                                                                           | 55  | 1  | 30-34   |
| Involuntary detention: comparison of clinical practices of psychiatry residents and faculty                                    | Hashmi A.; Shad M.;<br>Rhoades H.; Grover M.; Parsaik A.K.                       | 2014 | Academic psychiatry : the journal of the American Association of Directors of Psychiatric Residency Training and the Association for Academic Psychiatry | 38  | 5  | 619-622 |
| Web-based involuntary-commitment educational project for emergency medicine residents: an interdepartmental quality initiative | Vahabzadeh A.;<br>Wittenauer J.;<br>McDonald W.M.                                | 2013 | Academic psychiatry : the journal of the American Association of Directors of Psychiatric Residency Training and the Association for Academic Psychiatry | 37  | 1  | 64-65   |
| Knowledge of mental health legislation in junior doctors training in psychiatry                                                | Thakkar P.B.; Tokas D.                                                           | 2012 | Psychiatrist                                                                                                                                             | 36  | 3  | 119     |
| The Mental Health Act: Exploring the role of nurses                                                                            | Laing J.M.                                                                       | 2012 | British Journal of Nursing                                                                                                                               | 21  | 4  | 234-238 |
| SMILE: Simple, Mental Health, Initiative in Learning and Education                                                             | Ward L.J.                                                                        | 2011 | Education for health (Abingdon, England)                                                                                                                 | 24  | 3  | 537     |
| Assisted admissions? A national survey of general practitioner experience of involuntary admissions                            | Kelly M.; O'Sullivan K.;<br>Finegan P.; Moran J.;<br>Bradley C.                  | 2011 | Irish Medical Journal                                                                                                                                    | 104 | 9  | 273-275 |
| Knowledge of mental health legislation in junior doctors training in psychiatry                                                | Wadoo O.; Shah A.J.;<br>Jehaanandan N.; Laing M.;<br>Agarwal M.;<br>Kinderman P. | 2011 | Psychiatrist                                                                                                                                             | 35  | 12 | 460-466 |

|                                                                                                                                                                                       |                                                                       |      |                                                  |    |    |         |
|---------------------------------------------------------------------------------------------------------------------------------------------------------------------------------------|-----------------------------------------------------------------------|------|--------------------------------------------------|----|----|---------|
| Mental health law training should be mandatory for all doctors: Commentary on... Knowledge of mental health legislation in junior doctors training in psychiatry                      | Schofield C.                                                          | 2011 | Psychiatrist                                     | 35 | 12 | 466-468 |
| An audit of incomplete involuntary admissions to an approved Irish centre                                                                                                             | Rafiq A.; O'Hanlon M.                                                 | 2010 | Irish Journal of Psychological Medicine          | 27 | 3  | 143-146 |
| North Carolina resident psychiatrists knowledge of the commitment statutes: Do they stray from the legal standard in the hypothetical application of involuntary commitment criteria? | Kaufman A.R.; Way B.                                                  | 2010 | Psychiatric Quarterly                            | 81 | 4  | 363-367 |
| The Mental Health Act 1983 and incapacity: What general hospital doctors know                                                                                                         | Richards F.; Dale J.                                                  | 2009 | Psychiatric Bulletin                             | 33 | 5  | 176-178 |
| Protecting safety versus protecting rights: A case of emergency involuntary civil commitment gone astray                                                                              | Mallinger A.G.; Coates V.                                             | 2013 | Bipolar Disorders                                | 15 | 1  | 58-59   |
| An evaluation of a Mental Health Act educational resource                                                                                                                             | Kettles A.M.; Kiger A.M.; Philip K.; Caldow J.                        | 2008 | Journal of Psychiatric and Mental Health Nursing | 15 | 8  | 662-669 |
| Knowledge about the Scottish Mental Health Act in a general hospital setting                                                                                                          | Baig B.J.; Walker J.; Crowe E.S.; MacHale S.M.; Aditya H.; Potts S.G. | 2008 | Scottish Medical Journal                         | 53 | 2  | 15-17   |
| Implementation of the Mental Health Care Act (2002) at district hospitals in South Africa: Translating principles into practice                                                       | Burns J.K.                                                            | 2008 | South African Medical Journal                    | 98 | 1  | 46-49   |
| Differences in mental health law training                                                                                                                                             | Gosai I.                                                              | 2007 | British Journal of Hospital Medicine             | 68 | 3  | 165     |
| Proposed changes to the Mental Health Act of England and Wales: research indicating future educational and training needs for mental health nurses                                    | Hurley J.; Linsley P.                                                 | 2006 | Journal of psychiatric and mental health nursing | 13 | 1  | 48-54   |
| Section 5(2) Mental Health Act 1983: Does teaching make a difference?                                                                                                                 | Schofield C.J.; Zigmond T.                                            | 2006 | Medicine, Science and the Law                    | 46 | 3  | 229-232 |

|                                                                                                                                                |                                              |      |                                                                                                    |    |   |         |
|------------------------------------------------------------------------------------------------------------------------------------------------|----------------------------------------------|------|----------------------------------------------------------------------------------------------------|----|---|---------|
| TEMPO: A contemporary model for police education and training about mental illness                                                             | Coleman, Terry;<br>Cotton, Dorothy           | 2014 | International Journal of Law and Psychiatry                                                        | 37 | 4 | 325-333 |
| Intervening at the Entry Point: Differences in How CIT Trained and Non-CIT Trained Officers Describe Responding to Mental Health-Related Calls | Canada, Kelli E; Angell, Beth; Watson, Amy C | 2012 | Community Mental Health Journal                                                                    | 48 | 6 | 746-755 |
| Unconscious Aspects of Statutory Mental Health Social Work: Emotional Labour and the Approved Mental Health Professional                       | Gregor, Claire                               | 2010 | Journal of Social Work Practice                                                                    | 24 | 4 | 429-443 |
| Commentary: The challenge of training police officers                                                                                          | Price, M                                     | 2005 | Journal of the American Academy of Psychiatry and Law                                              | 33 | 1 | 50-54   |
| Theory for Approved Social Work: the Use of the Compulsory Admissions Assessments Schedule                                                     | Sheppard, Michael                            | 1993 | British Journal of Social Work                                                                     | 23 | 3 | 231-257 |
| Diagnosing vulnerability and “dangerousness”: police use of Section 136 in England and Wales.                                                  | Menkes, David B.; Bendelow, Gillian A.       | 2014 | Journal of Public Mental Health                                                                    | 13 | 2 | 70-82   |
| Visa refusal following compulsory hospital admission under the Mental Health Act 1983 ( England and Wales): fact or fiction?                   | Ashmore, R.                                  | 2015 | Journal of Psychiatric & Mental Health Nursing (John Wiley & Sons, Inc.)                           | 22 | 6 | 390-396 |
| 'Only connect' 'nearest relative's' experiences of mental health act assessments                                                               | Smith Martin Stuart                          | 2015 | Journal of Social Work Practice: Psychotherapeutic Approaches in Health, Welfare and the Community | 29 | 3 | 339-353 |
| Walking the tightrope of a Mental Health Act assessment                                                                                        | Dwyer Sandra                                 | 2012 | Journal of Social Work Practice: Psychotherapeutic Approaches in Health, Welfare and the Community | 26 | 3 | 341-353 |

|                                                                                                                                                                                           |                                                                      |      |                                                          |          |   |           |
|-------------------------------------------------------------------------------------------------------------------------------------------------------------------------------------------|----------------------------------------------------------------------|------|----------------------------------------------------------|----------|---|-----------|
| Approved social worker to approved mental health professional: evaluating the impact of changes within education and training                                                             | Parker Jo                                                            | 2010 | Journal of Mental Health Training Education and Practice | 5        | 2 | 19-26     |
| An audit of assessment and reporting by approved social workers (ASWs)                                                                                                                    | Davidson Gavin; Campbell Jim                                         | 2010 | British Journal of Social Work                           | 40       | 5 | 1609-1627 |
| Changing roles and responsibilities                                                                                                                                                       | Kousoulou Dorothy                                                    | 2008 | Mental Health Today                                      |          |   | 28-30     |
| Listen and learn                                                                                                                                                                          | Hopkins Graham                                                       | 2006 | Community Care                                           | 16.03.06 |   | 38-39     |
| 'In the real world we're all put on the spot at some time or other so you need to be prepared for it': an exploratory study of an oral method of assessing knowledge of mental health law | Henderson Jeanette; Lloyd Peter; Scott Heathers                      | 2002 | Social Work Education (The International Journal)        | 21       | 1 | 91-103    |
| The management and supervision of Approved Social Workers: aspects of law, policy and practice                                                                                            | Campbell Jim; et al                                                  | 2001 | Journal of Social Welfare and Family Law                 | 23       | 2 | 155-172   |
| The 1986 Mental Health (N.I.) Order and approved social work in Northern Ireland: time for change                                                                                         | Manktelow Roger                                                      | 1999 | Practice: Social Work in Action                          | 11       | 1 | 23-34     |
| The decision by approved mental health professionals to use compulsory powers under the Mental Health Act 1983: A Foucauldian discourse analysis.                                         | Buckland, Rosie                                                      | 2016 | British Journal of Social Work                           | 46       | 1 | 46-62     |
| Expanding roles within mental health legislation: An opportunity for professional growth or a missed opportunity?                                                                         | Hurley, J; Linsley, P                                                | 2007 | Journal of Psychiatric and Mental Health Nursing         | 14       | 6 | 535-541   |
| To Commit or Not to Commit: The Psychiatry Resident as a Variable in Involuntary Commitment Decisions.                                                                                    | Sattar, S. Pirzada; Finals, Debra A; Din, Atnad U; Appelbaum, Paul S | 2006 | Academic Psychiatry                                      | 30       | 3 | 191-195   |

|                                                                                                                                                                                                             |                                                |      |                                         |    |   |         |
|-------------------------------------------------------------------------------------------------------------------------------------------------------------------------------------------------------------|------------------------------------------------|------|-----------------------------------------|----|---|---------|
| A National Survey of Approved Social Workers in the UK: Information, Communication and Training Needs.                                                                                                      | Fakhoury, Walid K. H; Wright, Donna            | 2004 | British Journal of Social Work          | 34 | 5 | 663-675 |
| Multidisciplinary Reflections on Assessment for Compulsory Admission: The Views of Approved Social Workers, General Practitioners, Ambulance Crews, Police, Community Psychiatric Nurses and Psychiatrists. | Bowers, Len; Clark, Nicola; Callaghan, Patrick | 2003 | British Journal of Social Work          | 33 | 7 | 961-968 |
| Effect of a mental health educational program upon police officers.                                                                                                                                         | Godschalx, Susan M                             | 1984 | Research in Nursing & Health            | 7  | 2 | 111-117 |
| Psychiatric training and involuntary commitment.                                                                                                                                                            | Many, Seth E                                   | 1983 | Journal of Psychiatry & Law             | 11 | 1 | 41-53   |
| Implementing the Mental Health Act 2001 in Ireland: Views of Irish general practitioners.                                                                                                                   | Jabbar, F; Aziz, M; Kelly, B. D                | 2013 | Irish Journal of Psychological Medicine | 30 | 4 | 255-259 |
| Training in the Mental Health Act: see one, do one, teach one?                                                                                                                                              | Harrison, Judy                                 | 1996 | Psychiatric Bulletin                    | 20 | 3 | 160-161 |
